# Supplementary material for: Cultured Meat Safety Research Priorities: Regulatory and Governmental Perspectives
Source: MDPI journal article supplement (doi:10.3390/foods12142645), 2023-07-08
Supplement: s1 [file s1]

## **Supplement S2**

### ***List of interview and workshop participant affiliations***

European Food Safety Authority

Food Standards Australia New Zealand

Kenya Bureau of Standards

National Food Service, Ministry of Health, Israel

Singapore Food Agency

National University of Singapore (NUS)

Duke-NUS Medical School

US Food and Drug Administration

Zambia National Biosafety Authority

Governmental representatives from 6 additional undisclosed jurisdictions
